# Supplementary material for: HyperChIP: identification of hypervariable signals across ChIP-seq or ATAC-seq samples
Source: PubMed Central journal article supplement (PMC8883642; doi:10.1186/s13059-022-02627-9), 2022-02-28
Supplement: 13059_2022_2627_MOESM3_ESM.pdf [file 13059_2022_2627_MOESM3_ESM.pdf]

| GO term                                                                     | $-\text{Log}_{10}(p\text{-value})$ |
|-----------------------------------------------------------------------------|------------------------------------|
| histone lysine demethylation (GO:0070076)                                   | 4.52                               |
| tRNA modification (GO:0006400)                                              | 4.13                               |
| RNA catabolic process (GO:0006401)                                          | 4.01                               |
| histone H3 acetylation (GO:0043966)                                         | 3.90                               |
| histone acetylation (GO:0016573)                                            | 3.84                               |
| cellular macromolecule catabolic process (GO:0044265)                       | 3.70                               |
| histone H3-K4 demethylation (GO:0034720)                                    | 3.32                               |
| energy coupled proton transport, down electrochemical gradient (GO:0015985) | 3.28                               |
| cellular response to gamma radiation (GO:0071480)                           | 3.00                               |
| purine ribonucleoside monophosphate biosynthetic process (GO:0009168)       | 2.97                               |
| DNA metabolic process (GO:0006259)                                          | 2.93                               |
| nucleobase-containing compound catabolic process (GO:0034655)               | 2.80                               |
| purine-containing compound biosynthetic process (GO:0072522)                | 2.78                               |
| RNA metabolic process (GO:0016070)                                          | 2.72                               |
| regulation of generation of precursor metabolites and energy (GO:0043467)   | 2.72                               |
| genetic imprinting (GO:0071514)                                             | 2.64                               |
| NADH metabolic process (GO:0006734)                                         | 2.64                               |
| cellular response to ionizing radiation (GO:0071479)                        | 2.61                               |
| cristae formation (GO:0042407)                                              | 2.53                               |
| ribonucleoside bisphosphate biosynthetic process (GO:0034030)               | 2.49                               |

**Table S1. Top 20 GO terms enriched from the genes linked with the significant proximal LVRs identified for the H3K27ac CHIP-seq data set.**

| GO term                                                                           | $-\text{Log}_{10}(p\text{-value})$ |
|-----------------------------------------------------------------------------------|------------------------------------|
| positive regulation of transcription from RNA polymerase II promoter (GO:0045944) | 6.75                               |
| regulation of transcription from RNA polymerase II promoter (GO:0006357)          | 6.62                               |
| cartilage development (GO:0051216)                                                | 6.12                               |
| epidermis development (GO:0008544)                                                | 6.12                               |
| surfactant homeostasis (GO:0043129)                                               | 5.65                               |
| chemical homeostasis within a tissue (GO:0048875)                                 | 5.65                               |
| positive regulation of transcription, DNA-templated (GO:0045893)                  | 5.52                               |
| kidney development (GO:0001822)                                                   | 4.90                               |
| negative regulation of multicellular organismal process (GO:0051241)              | 4.71                               |
| chondrocyte differentiation (GO:0002062)                                          | 4.44                               |
| regulation of cartilage development (GO:0061035)                                  | 4.38                               |
| renal system development (GO:0072001)                                             | 4.35                               |
| lung development (GO:0030324)                                                     | 4.18                               |
| collecting duct development (GO:0072044)                                          | 3.99                               |
| renal absorption (GO:0070293)                                                     | 3.86                               |
| endochondral bone morphogenesis (GO:0060350)                                      | 3.86                               |
| endochondral ossification (GO:0001958)                                            | 3.64                               |
| positive regulation of epithelial cell differentiation (GO:0030858)               | 3.52                               |
| negative regulation of transcription, DNA-templated (GO:0045892)                  | 3.48                               |
| negative regulation of cell differentiation (GO:0045596)                          | 3.43                               |

**Table S2. Top 20 GO terms enriched from the genes linked with the significant proximal HVRs identified for the H3K27ac ChIP-seq data set.**

| Cancer type                                                      | Abbreviation | Annotation       | Cohort size |
|------------------------------------------------------------------|--------------|------------------|-------------|
| Adrenocortical carcinoma                                         | ACC          |                  | 9           |
| Bladder Urothelial Carcinoma                                     | BLCA         | SC               | 10          |
| Breast invasive carcinoma                                        | BRCA         |                  | 75          |
| Cervical squamous cell carcinoma and endocervical adenocarcinoma | CESC         | SC               | 4           |
| Cholangiocarcinoma                                               | CHOL         |                  | 5           |
| Colon adenocarcinoma                                             | COAD         | DIAD             | 41          |
| Esophageal carcinoma                                             | ESCA         | SC or DIAD       | 18          |
| Glioblastoma multiforme                                          | GBM          | Brain cancer     | 9           |
| Head and Neck squamous cell carcinoma                            | HNSC         | SC               | 9           |
| Kidney renal clear cell carcinoma                                | KIRC         | Kidney carcinoma | 16          |
| Kidney renal papillary cell carcinoma                            | KIRP         | Kidney carcinoma | 34          |
| Brain Lower Grade Glioma                                         | LGG          | Brain cancer     | 13          |
| Liver hepatocellular carcinoma                                   | LIHC         |                  | 17          |
| Lung adenocarcinoma                                              | LUAD         |                  | 22          |
| Lung squamous cell carcinoma                                     | LUSC         | SC               | 16          |
| Mesothelioma                                                     | MESO         |                  | 7           |
| Pheochromocytoma and Paraganglioma                               | PCPG         |                  | 9           |
| Prostate adenocarcinoma                                          | PRAD         |                  | 26          |
| Skin Cutaneous Melanoma                                          | SKCM         |                  | 13          |
| Stomach adenocarcinoma                                           | STAD         | DIAD             | 21          |
| Testicular Germ Cell Tumors                                      | TGCT         |                  | 9           |
| Thyroid carcinoma                                                | THCA         |                  | 14          |
| Uterine Corpus Endometrial Carcinoma                             | UCEC         |                  | 13          |

**Table S3. Cancer types involved in the TCGA ATAC-seq data set.** Note that in TCGA studies the abbreviation CESC refers to both cervical squamous cell carcinoma and endocervical adenocarcinoma, but all the 4 CESC patients in this data set belong in the former. Note also that the 18 ESCA patients in this data set consist of 12 ESSC (esophageal squamous cell carcinoma) and 6 ESAD (esophageal adenocarcinoma) cases, which belong in the SC and DIAD classes, respectively. SC, squamous cell carcinoma; DIAD, digestive adenocarcinoma.
